# Supplementary material for: Syntheses, structural characterization and CO releasing properties of boranocarbonate [H3BCO2H]− derivatives
Source: Royal Society of Chemistry journal article supplement (doi:10.1039/c0ob00099j), 2010-01-01
Supplement: c0ob00099j.pdf [file c0ob00099j.pdf]

## Syntheses, structural characterization and CO releasing properties of boranocarbonate $[\text{H}_3\text{BCO}_2\text{H}]^-$ derivatives

Tamil Selvi Pitchumony, Bernhard Spingler, Roberto Motterlini, and Roger Alberto

### Supplementary Information

#### 1. Selected CO releasing traces and data fitting

For all compounds,  $t_1$  corresponds to  $1/k_{\text{obs}}$  (min) and  $t_{1/2} = \ln 2/k_{\text{obs}}$

##### 1a) Compound $[\text{Na}(18\text{-crown-6})][\text{H}_3\text{BCOhist}]$ (4)

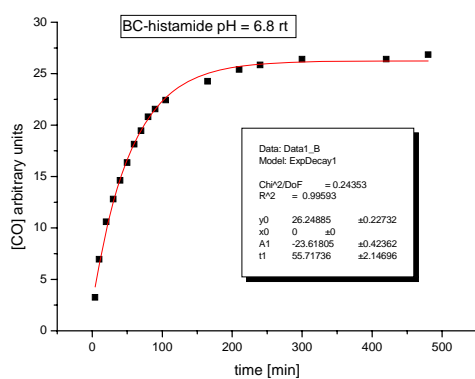

$t_{1/2} = 39$  min

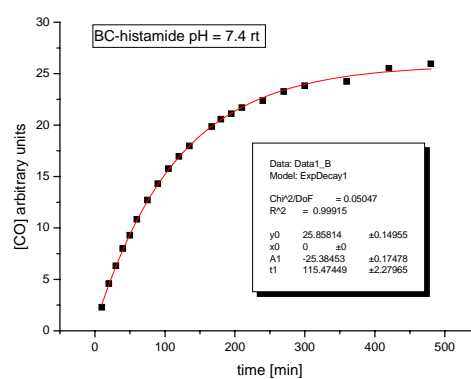

$t_{1/2} = 80$  min

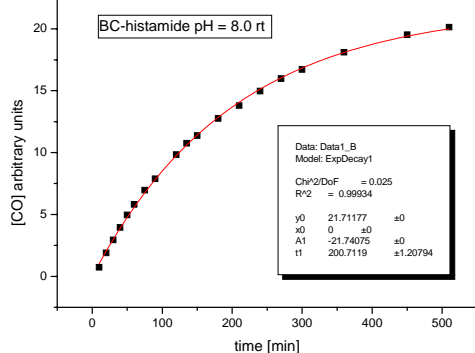

$t_{1/2} = 139$  min

### 1b) Compound $[\text{Na}(18\text{-crown-6})]_2[(\text{H}_3\text{BCO})_2\text{en}]$ (8)

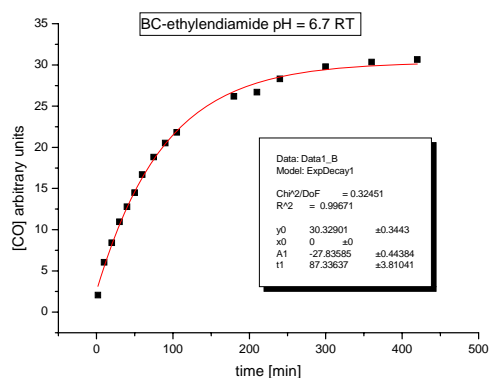

$t_{1/2} = 63$  min

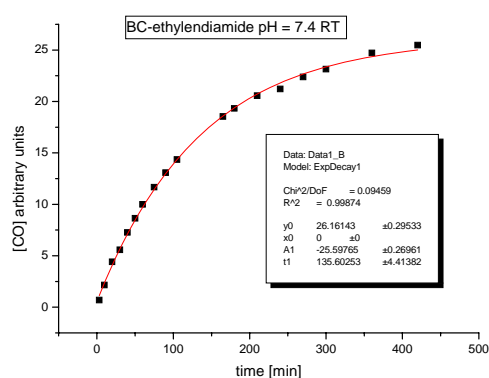

$t_{1/2} = 95$  min

### 1c) Compound $\text{Na}_2[\text{H}_3\text{BCOgly}]$ (7)

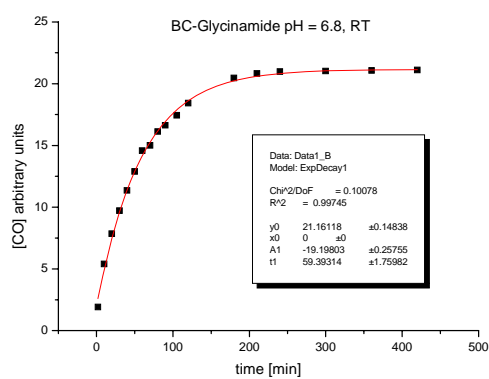

$t_{1/2} = 41$  min

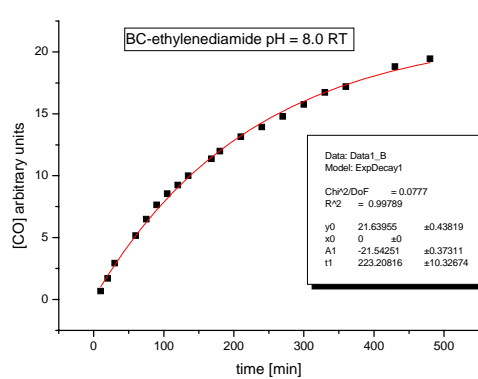

$t_{1/2} = 155$  min

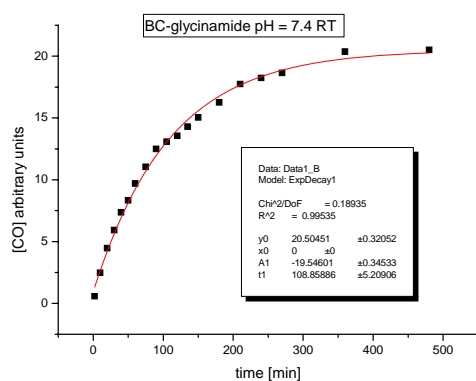

$t_{1/2} = 80$  min

### 1d) Compound $\text{Na}_2[\text{H}_3\text{BCOani}]$ (**6**)

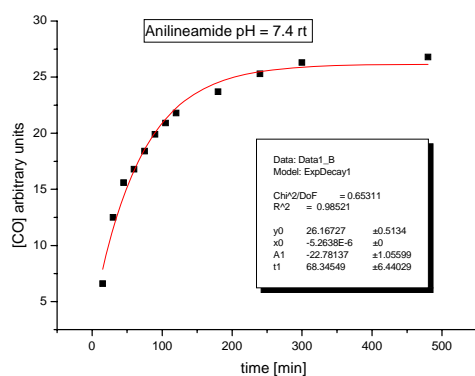

$$t_{1/2} = 46 \text{ min}$$

The curves have been fitted with Origin 6.1. The expression to which the curves were fitted is  $y = y_0 + A_1 \cdot \exp(-(x-x_0)/t_1)$

### 2. $^{11}\text{B}$ and $^1\text{H}$ NMR spectrum during CO release of compound **3**.

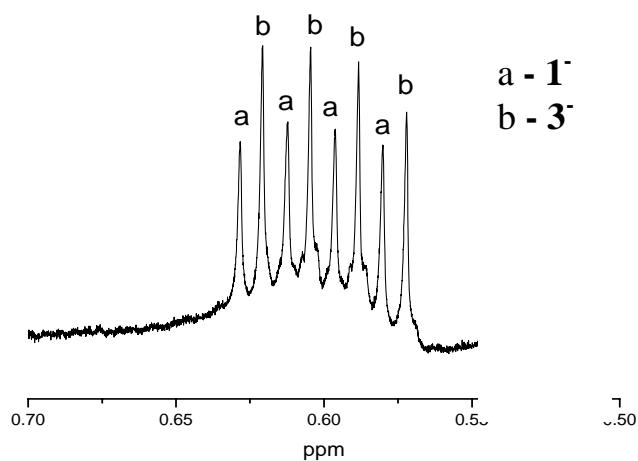

$^1\text{H}$  NMR spectrum showing two types of  $\{\text{BH}_3\}$  fragment during CO release from **3**<sup>-</sup>

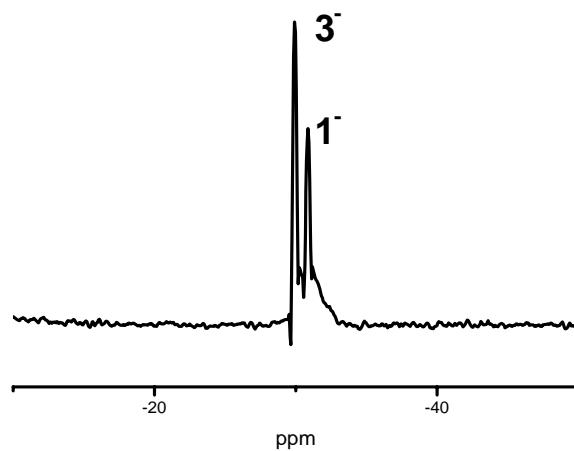

$^{11}\text{B}$  NMR spectrum showing two types of  $^{11}\text{B}$  during CO release from **3**<sup>-</sup>

### 3. Crystallographic data

|                                           | [Na(18-crown-6)][2]                               | [Na(18-crown-6)][3]                                | [K(18-crown-6)][4]                                              | [K(18-crown-6)][6] <sup>*1/2</sup> (C <sub>6</sub> H <sub>5</sub> NH <sub>2</sub> ) | [K(18-crown-6)] <sub>2</sub> [8]                                                             |
|-------------------------------------------|---------------------------------------------------|----------------------------------------------------|-----------------------------------------------------------------|-------------------------------------------------------------------------------------|----------------------------------------------------------------------------------------------|
| Empirical formula                         | C <sub>15</sub> H <sub>32</sub> BNaO <sub>8</sub> | C <sub>17</sub> H <sub>35</sub> BNNaO <sub>8</sub> | C <sub>18</sub> H <sub>35</sub> BKN <sub>3</sub> O <sub>7</sub> | C <sub>22</sub> H <sub>36.5</sub> BKN <sub>1.5</sub> O <sub>7</sub>                 | C <sub>28</sub> H <sub>60</sub> B <sub>2</sub> K <sub>2</sub> N <sub>2</sub> O <sub>14</sub> |
| Formula weight                            | 374.21                                            | 415.26                                             | 455.40                                                          | 483.93                                                                              | 748.60                                                                                       |
| Crystal system                            | Monoclinic                                        | Monoclinic                                         | Orthorhombic                                                    | Orthorhombic                                                                        | Monoclinic                                                                                   |
| Diffractionmeter                          | Oxford Diffraction<br>Xcalibur Ruby               | IPDS 2T Stoe                                       | Oxford Diffraction<br>Xcalibur Ruby                             | Oxford Diffraction<br>Xcalibur Ruby                                                 | Oxford Diffraction<br>Xcalibur Ruby                                                          |
| Wavelength [Å]                            | 0.7107                                            | 1.5418                                             | 0.7107                                                          | 0.7107                                                                              | 0.7107                                                                                       |
| Space group                               | P2 <sub>1</sub>                                   | P2 <sub>1</sub> /n                                 | P2 <sub>1</sub> 2 <sub>1</sub> 2 <sub>1</sub>                   | P2 <sub>1</sub> 2 <sub>1</sub> 2                                                    | P2 <sub>1</sub> /n                                                                           |
| a [Å]                                     | 8.4146(2)                                         | 8.0562(3)                                          | 8.5561(2)                                                       | 20.6439(7)                                                                          | 8.5100(2)                                                                                    |
| b [Å]                                     | 18.1567(4)                                        | 18.4484(6)                                         | 15.6585(4)                                                      | 14.6541(4)                                                                          | 14.5204(4)                                                                                   |
| c [Å]                                     | 13.8651(4)                                        | 15.3958(6)                                         | 17.7150(4)                                                      | 8.4379(3)                                                                           | 15.9909(3)                                                                                   |
| β [°]                                     | 105.663(3)                                        | 100.588(3)                                         |                                                                 |                                                                                     | 95.544(2)                                                                                    |
| Volume [Å <sup>3</sup> ]                  | 2039.67(9)                                        | 2249.23(14)                                        | 2373.38(10)                                                     | 2552.61(14)                                                                         | 1966.73(8)                                                                                   |
| Z                                         | 4                                                 | 4                                                  | 4                                                               | 4                                                                                   | 2                                                                                            |
| Crystal size [mm <sup>3</sup> ]           | 0.50 x 0.10 x 0.10                                | 0.27 x 0.27 x 0.09                                 | 0.25 x 0.07 x 0.05                                              | 0.52 x 0.09 x 0.06                                                                  | 0.17 x 0.12 x 0.10                                                                           |
| Crystal description                       | white needle                                      | colourless plate                                   | colourless needle                                               | colourless needle                                                                   | colourless prism                                                                             |
| Reflections collected                     | 28939                                             | 14351                                              | 21375                                                           | 15585                                                                               | 15706                                                                                        |
| Independent reflections, R <sub>int</sub> | 6395, 0.0317                                      | 3535, 0.0960                                       | 5896, 0.0446                                                    | 5548, 0.0548                                                                        | 3998, 0.0459                                                                                 |
| Reflections observed [I>2σ(I)]            | 5074                                              | 3063                                               | 3384                                                            | 3227                                                                                | 2040                                                                                         |
| Completeness to theta                     | 99.8 % to 30.51°                                  | 99.0 % to 62.37°                                   | 99.9 % to 28.28°                                                | 99.9 % to 27.10°                                                                    | 99.6 % to 26.37°                                                                             |
| Data / restraints / parameters            | 6395 / 1 / 457                                    | 3535 / 0 / 256                                     | 5896 / 0 / 280                                                  | 5548 / 23 / 307                                                                     | 3998 / 0 / 226                                                                               |

|                                                           |                             |                             |                             |                             |                             |
|-----------------------------------------------------------|-----------------------------|-----------------------------|-----------------------------|-----------------------------|-----------------------------|
| Goodness-of-fit on $F^2$                                  | 1.083                       | 1.097                       | 0.880                       | 0.933                       | 0.991                       |
| Final R indices [ $I > 2\sigma(I)$ ]                      | R1 = 0.0483<br>wR2 = 0.1014 | R1 = 0.0529<br>wR2 = 0.1479 | R1 = 0.0380<br>wR2 = 0.0580 | R1 = 0.0569<br>wR2 = 0.0848 | R1 = 0.0383<br>wR2 = 0.0774 |
| R indices (all data)                                      | R1 = 0.0680<br>wR2 = 0.1154 | R1 = 0.0589<br>wR2 = 0.1514 | R1 = 0.0872<br>wR2 = 0.0694 | R1 = 0.1202<br>wR2 = 0.0961 | R1 = 0.1097<br>wR2 = 0.1056 |
| Absolute structure parameter                              | 0.0(3)                      |                             | 0.01(3)                     | 0.08(5)                     |                             |
| Largest diff. peak and hole [ $e \cdot \text{\AA}^{-3}$ ] | 0.334 and -0.200            | 0.272 and -0.233            | 0.181 and -0.191            | 0.460 and -0.217            | 0.225 and -0.271            |

#### 4. ORTEP representation of Na[2]

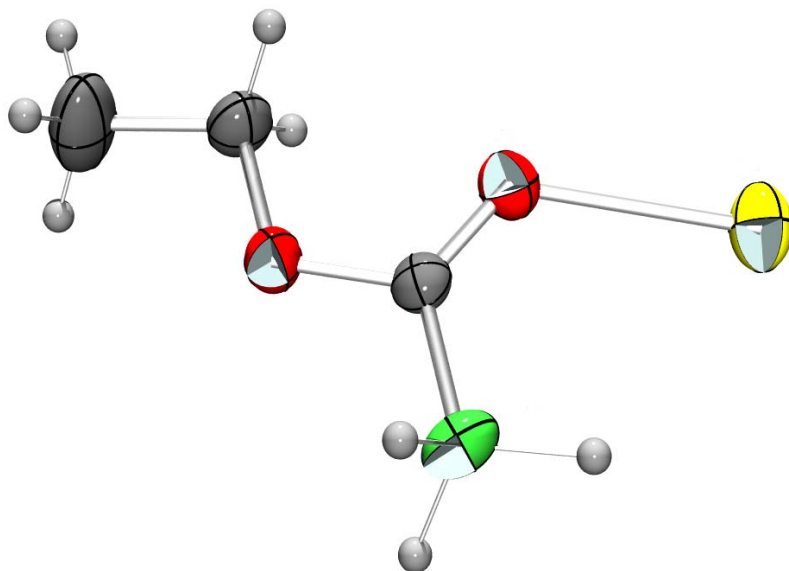

Only one out of 2 molecules shown for clarity. The 18-crown-6 was omitted for clarity as well.
